# Supplementary material
Source: PubMed Central journal article supplement (PMC6870190)
Supplement: HBM-34-3129-s001.pdf [file HBM-34-3129-s001.pdf]

## Supplementary Information

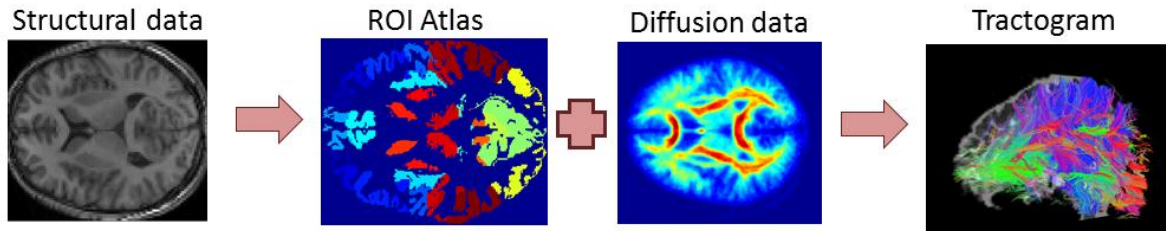

**Figure S1:** Generation of the tractograms from the young healthy "atlas" data set.

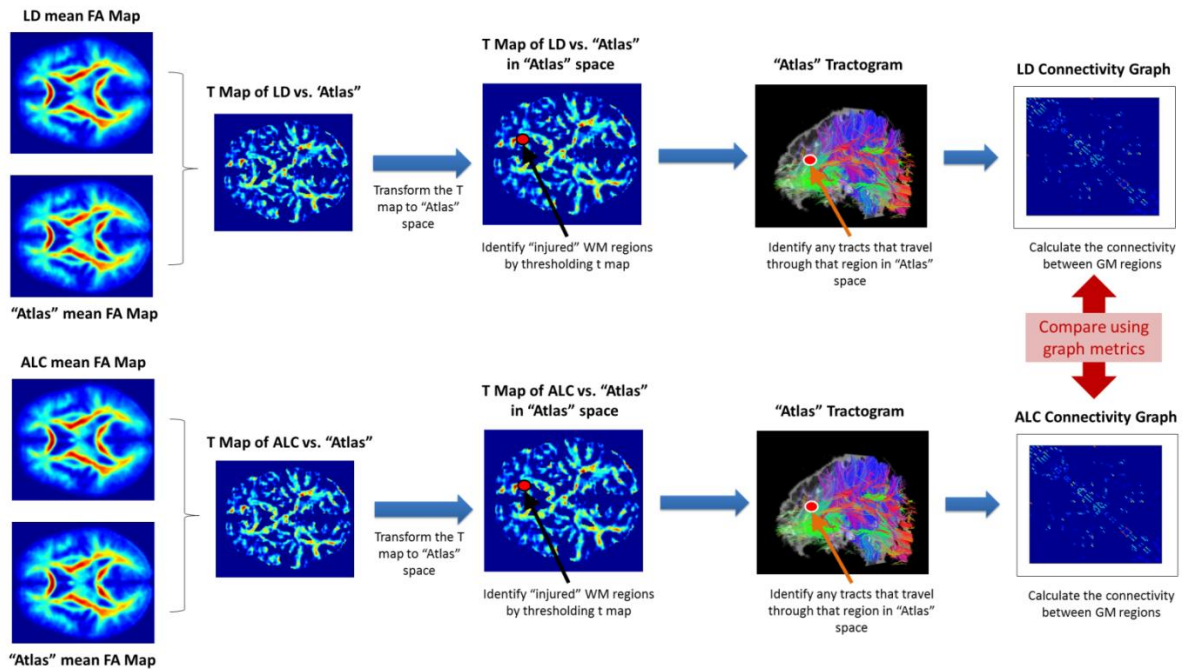

**Figure S2:** The process to determine changes to brain network metrics in alcoholic patients using high-resolution tractography data.

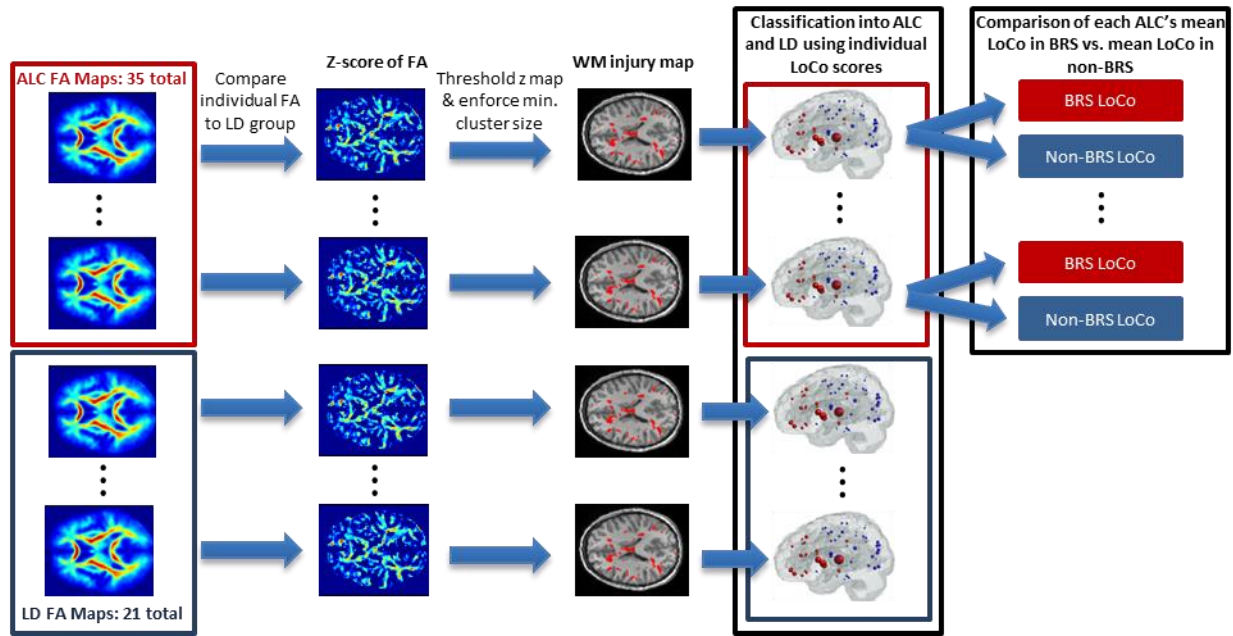

**Figure S3:** The processing pipeline for the two individual LoCo analyses: 1) classification into groups and 2) comparison of the ALC individuals' mean LoCo scores in the BRS and non-BRS regions.

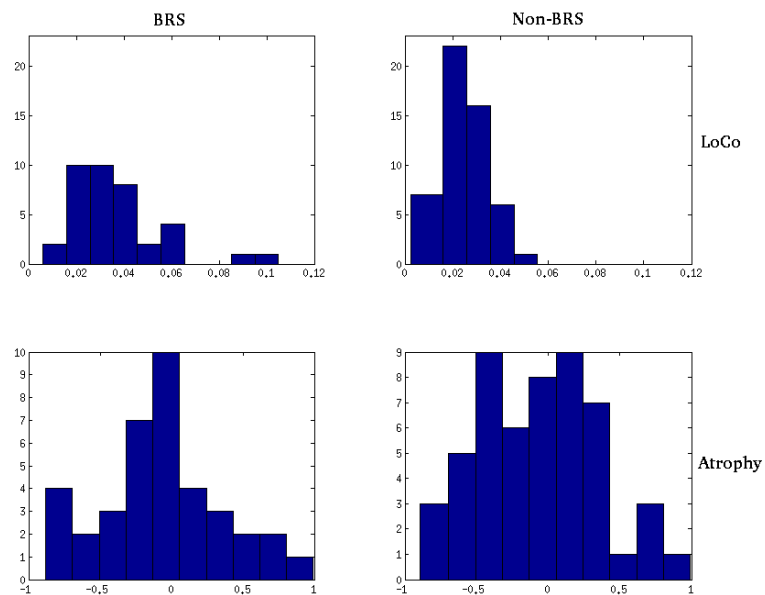

**Figure S4:** Histograms of each ALC individual's mean LoCo (top row) and each ALC individual's mean GM atrophy (bottom row) in the BRS (left column) and non-BRS regions (right column). This is the comparison of the BRS vs. non-BRS at the level of the individual LoCo scores, as described in Figure S3.

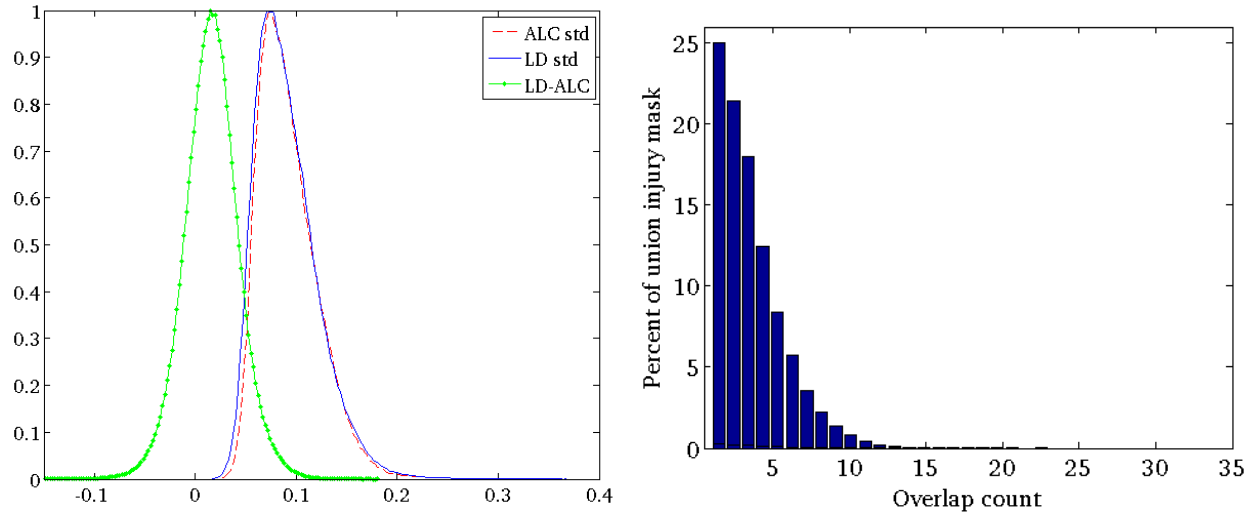

**Figure S5:** Panel A compares the normalized histograms of the differences in the group means versus the groups' standard deviations (in voxels with FA greater than 0.1). Panel B was created by first taking the union of all the ALC individuals' WM injury masks. For each voxel in this union mask, we counted the number of times it was included in each of the 35 ALC individuals' WM injury masks. The histogram can be interpreted thus: the first bar indicates that 25% of all of the voxels in the union WM injury mask were only present in 1 individual's WM injury mask.

Tables: Regions with yellow highlight in tables S1-S3 are identified as members of the BRS.

**Table S1:** LoCo score for each of 90 parcellated GM regions. The LoCo is the percent of total fibers connecting to that region that intersect regions of significantly low FA in the ALC group.

| Region               | LoCo     |
|----------------------|----------|
| Caudate_R            | 0.098882 |
| Thalamus_R           | 0.082242 |
| Cingulum_Ant_R       | 0.069836 |
| Occipital_Inf_R      | 0.067463 |
| Cingulum_Post_R      | 0.061913 |
| Occipital_Mid_R      | 0.061224 |
| Thalamus_L           | 0.060388 |
| Frontal_Sup_Orb_R    | 0.054151 |
| Rectus_R             | 0.052246 |
| Frontal_Mid_Orb_R    | 0.049964 |
| Hippocampus_R        | 0.045582 |
| Lingual_R            | 0.04493  |
| Temporal_Mid_R       | 0.040719 |
| Frontal_Sup_R        | 0.040365 |
| Hippocampus_L        | 0.038044 |
| Olfactory_R          | 0.03558  |
| Occipital_Mid_L      | 0.035349 |
| Caudate_L            | 0.034854 |
| Putamen_R            | 0.03411  |
| ParaHippocampal_R    | 0.033709 |
| Fusiform_R           | 0.033387 |
| Frontal_Mid_Orb_R    | 0.033163 |
| Frontal_Sup_Medial_R | 0.032484 |
| Calcarine_R          | 0.032469 |
| Occipital_Inf_L      | 0.029655 |
| Precuneus_R          | 0.027518 |
| Putamen_L            | 0.027453 |
| Temporal_Inf_R       | 0.025708 |
| Pallidum_L           | 0.025378 |
| Frontal_Mid_R        | 0.023403 |
| Fusiform_L           | 0.02325  |
| Cingulum_Mid_R       | 0.022715 |
| Frontal_Mid_Orb_L    | 0.021779 |

|                      |          |
|----------------------|----------|
| Temporal_Inf_L       | 0.021032 |
| Frontal_Inf_Orb_R    | 0.020934 |
| Frontal_Inf_Orb_L    | 0.020409 |
| Heschl_L             | 0.020172 |
| Pallidum_R           | 0.019707 |
| Rectus_L             | 0.019115 |
| Cingulum_Ant_L       | 0.018399 |
| Temporal_Mid_L       | 0.017872 |
| Occipital_Sup_R      | 0.017738 |
| Cingulum_Post_L      | 0.017428 |
| Insula_R             | 0.016922 |
| Calcarine_L          | 0.016632 |
| Lingual_L            | 0.01592  |
| Olfactory_L          | 0.015586 |
| Occipital_Sup_L      | 0.015012 |
| Angular_R            | 0.014896 |
| Frontal_Sup_Orb_L    | 0.014875 |
| ParaHippocampal_L    | 0.0146   |
| Cuneus_R             | 0.0134   |
| Temporal_Sup_R       | 0.013374 |
| Angular_L            | 0.012552 |
| Precuneus_L          | 0.011623 |
| Frontal_Mid_Orb_L    | 0.01081  |
| Insula_L             | 0.010026 |
| Temporal_Pole_Sup_R  | 0.009389 |
| Temporal_Pole_Mid_R  | 0.008826 |
| Temporal_Sup_L       | 0.008511 |
| Cuneus_L             | 0.008148 |
| Heschl_R             | 0.007918 |
| Frontal_Inf_Tri_R    | 0.007773 |
| Precentral_R         | 0.006494 |
| Rolandic_Oper_L      | 0.005975 |
| Amygdala_L           | 0.005929 |
| Frontal_Inf_Oper_R   | 0.005286 |
| Postcentral_R        | 0.004526 |
| Supp_Motor_Area_R    | 0.004509 |
| Cingulum_Mid_L       | 0.004281 |
| SupraMarginal_R      | 0.003668 |
| Paracentral_Lobule_R | 0.002812 |
| Parietal_Inf_R       | 0.002675 |
| Rolandic_Oper_R      | 0.002383 |

|                      |          |
|----------------------|----------|
| Frontal_Inf_Oper_L   | 0.002213 |
| Temporal_Pole_Sup_L  | 0.002089 |
| Frontal_Inf_Tri_L    | 0.002086 |
| SupraMarginal_L      | 0.001971 |
| Parietal_Inf_L       | 0.00187  |
| Frontal_Sup_Medial_L | 0.001447 |
| Amygdala_R           | 0.001438 |
| Frontal_Mid_L        | 0.001243 |
| Frontal_Sup_L        | 0.001004 |
| Postcentral_L        | 0.000827 |
| Parietal_Sup_R       | 0.000717 |
| Precentral_L         | 0.000609 |
| Parietal_Sup_L       | 0.000541 |
| Supp_Motor_Area_L    | 0.000537 |
| Paracentral_Lobule_L | 0.000324 |
| Temporal_Pole_Mid_L  | 0.000105 |

**Table S2:** List of t-scores of volume per region. ALC minus LD (negative values indicate smaller than normal volume)

| Region               | t-score  |
|----------------------|----------|
| Frontal_Mid_R        | -2.76948 |
| Olfactory_R          | -2.43487 |
| Frontal_Sup_Medial_R | -2.19364 |
| Frontal_Sup_L        | -2.1613  |
| Frontal_Sup_Medial_L | -1.90642 |
| Frontal_Sup_R        | -1.83191 |
| Parietal_Sup_L       | -1.78447 |
| Parietal_Sup_R       | -1.50736 |
| Precentral_R         | -1.49989 |
| Parietal_Inf_R       | -1.35578 |
| Supp_Motor_Area_R    | -1.30265 |
| Supp_Motor_Area_L    | -1.24467 |
| Insula_R             | -1.03027 |
| Cuneus_L             | -1.00522 |
| Frontal_Inf_Tri_R    | -0.92225 |
| Postcentral_R        | -0.92098 |
| Frontal_Mid_L        | -0.91873 |
| Paracentral_Lobule_L | -0.88058 |
| Rolandic_Oper_R      | -0.81429 |
| Olfactory_L          | -0.73929 |
| Paracentral_Lobule_R | -0.73378 |
| Rolandic_Oper_L      | -0.708   |
| Rectus_R             | -0.6828  |
| Precentral_L         | -0.64013 |
| Caudate_L            | -0.63013 |
| Occipital_Mid_R      | -0.56478 |
| Postcentral_L        | -0.54999 |
| Temporal_Sup_R       | -0.51399 |
| Temporal_Pole_Sup_L  | -0.49688 |
| Insula_L             | -0.48618 |
| Frontal_Sup_Orb_L    | -0.46573 |
| Heschl_R             | -0.42895 |
| Precuneus_L          | -0.31466 |
| Occipital_Sup_R      | -0.21815 |
| Occipital_Sup_L      | -0.16214 |
| Frontal_Inf_Tri_L    | -0.10478 |
| Putamen_R            | -0.06635 |
| Hippocampus_R        | -0.01261 |
| Frontal_Inf_Oper_R   | 0.058064 |
| Caudate_R            | 0.073584 |
| Amygdala_L           | 0.07414  |
| Amygdala_R           | 0.117666 |
| Frontal_Mid_Orb_L    | 0.139358 |
| Angular_L            | 0.210261 |
| Fusiform_L           | 0.223249 |
| Angular_R            | 0.246987 |
| Temporal_Pole_Mid_L  | 0.266217 |
| Cingulum_Ant_L       | 0.291276 |
| Calcarine_L          | 0.296748 |
| Temporal_Pole_Mid_R  | 0.360943 |
| Frontal_Mid_Orb_R    | 0.381481 |
| Hippocampus_L        | 0.42214  |
| Heschl_L             | 0.442933 |
| Temporal_Inf_R       | 0.46046  |
| Frontal_Inf_Orb_R    | 0.513689 |
| Putamen_L            | 0.569784 |
| Occipital_Inf_L      | 0.63179  |
| ParaHippocampal_R    | 0.63394  |
| Temporal_Pole_Sup_R  | 0.635745 |
| Rectus_L             | 0.679429 |
| Frontal_Inf_Orb_L    | 0.744906 |
| Cingulum_Ant_R       | 0.818469 |
| Fusiform_R           | 0.825277 |
| ParaHippocampal_L    | 1.050584 |
| Cuneus_R             | 1.097399 |
| Temporal_Sup_L       | 1.097811 |
| Lingual_R            | 1.169725 |
| Frontal_Sup_Orb_R    | 1.176148 |
| Parietal_Inf_L       | 1.214913 |
| Occipital_Inf_R      | 1.254058 |
| Occipital_Mid_L      | 1.265978 |
| Pallidum_R           | 1.355105 |
| Frontal_Mid_Orb_L    | 1.364577 |
| Precuneus_R          | 1.410894 |
| Temporal_Mid_R       | 1.537444 |
| Lingual_L            | 1.553106 |
| Pallidum_L           | 1.655974 |
| Calcarine_R          | 1.665253 |
| Cingulum_Mid_L       | 1.674942 |
| Cingulum_Mid_R       | 1.692427 |
| Frontal_Inf_Oper_L   | 1.692924 |

|                   |          |
|-------------------|----------|
| SupraMarginal_R   | 1.693516 |
| Temporal_Mid_L    | 1.707403 |
| Frontal_Mid_Orb_R | 1.717287 |
| Thalamus_L        | 1.812668 |
| Thalamus_R        | 1.847411 |
| Cingulum_Post_L   | 2.028942 |
| Cingulum_Post_R   | 2.115099 |
| Temporal_Inf_L    | 2.119281 |
| SupraMarginal_L   | 2.201346 |

**Table S3:** List of weights per region from the first eigenvector of the SVD

| Region               | Eigenvector |
|----------------------|-------------|
| Thalamus_L           | 0.334945    |
| Thalamus_R           | 0.287741    |
| Caudate_R            | 0.210054    |
| Caudate_L            | 0.203707    |
| Pallidum_L           | 0.195768    |
| Putamen_L            | 0.188913    |
| Putamen_R            | 0.184249    |
| Insula_R             | 0.164341    |
| Frontal_Sup_Orb_R    | 0.136737    |
| Cingulum_Post_R      | 0.133262    |
| Rolandic_Oper_R      | 0.13208     |
| Cingulum_Ant_R       | 0.126262    |
| Insula_L             | 0.125994    |
| Occipital_Mid_L      | 0.123896    |
| Frontal_Sup_R        | 0.120896    |
| Frontal_Mid_Orb_R    | 0.118357    |
| Hippocampus_R        | 0.117527    |
| Occipital_Inf_R      | 0.116983    |
| Frontal_Inf_Oper_R   | 0.1168      |
| Rolandic_Oper_L      | 0.115226    |
| Occipital_Inf_L      | 0.112832    |
| Calcarine_R          | 0.10894     |
| Pallidum_R           | 0.108594    |
| Occipital_Mid_R      | 0.107405    |
| Cingulum_Ant_L       | 0.107044    |
| Occipital_Sup_R      | 0.106417    |
| SupraMarginal_R      | 0.104343    |
| Postcentral_R        | 0.101342    |
| Rectus_R             | 0.097777    |
| Occipital_Sup_L      | 0.097244    |
| Frontal_Mid_Orb_R    | 0.096096    |
| Frontal_Inf_Tri_R    | 0.093983    |
| Cuneus_R             | 0.093448    |
| Frontal_Mid_R        | 0.091353    |
| Precentral_R         | 0.090502    |
| Precentral_L         | 0.08991     |
| Frontal_Mid_Orb_L    | 0.089823    |
| Frontal_Inf_Orb_R    | 0.088427    |
| Frontal_Inf_Oper_L   | 0.087115    |
| Precuneus_R          | 0.086015    |
| Frontal_Sup_Medial_R | 0.085325    |
| Cingulum_Post_L      | 0.084136    |
| Cingulum_Mid_R       | 0.084103    |
| Frontal_Sup_Orb_L    | 0.08355     |
| Temporal_Mid_R       | 0.083197    |
| Postcentral_L        | 0.083095    |
| Heschl_L             | 0.082673    |
| Frontal_Mid_Orb_L    | 0.081049    |
| Lingual_R            | 0.080423    |
| Hippocampus_L        | 0.079325    |
| Frontal_Sup_L        | 0.07919     |
| Angular_R            | 0.078934    |
| Cingulum_Mid_L       | 0.077519    |
| Paracentral_Lobule_L | 0.077501    |
| Supp_Motor_Area_R    | 0.074461    |
| Frontal_Inf_Orb_L    | 0.073621    |
| Paracentral_Lobule_R | 0.073548    |
| Frontal_Inf_Tri_L    | 0.07215     |
| Temporal_Inf_R       | 0.070973    |
| Heschl_R             | 0.070665    |
| Frontal_Mid_L        | 0.069471    |
| Parietal_Inf_L       | 0.067029    |
| Frontal_Sup_Medial_L | 0.066156    |
| Rectus_L             | 0.065807    |
| Precuneus_L          | 0.064065    |
| Supp_Motor_Area_L    | 0.064059    |
| Angular_L            | 0.063347    |
| Fusiform_R           | 0.062906    |
| SupraMarginal_L      | 0.062344    |
| Temporal_Sup_R       | 0.06185     |
| Olfactory_R          | 0.061386    |
| Fusiform_L           | 0.058954    |
| Calcarine_L          | 0.0589      |
| Parietal_Sup_L       | 0.058762    |
| Temporal_Mid_L       | 0.057539    |
| Lingual_L            | 0.057452    |
| Cuneus_L             | 0.057113    |
| Temporal_Sup_L       | 0.056274    |
| Parietal_Inf_R       | 0.054762    |
| ParaHippocampal_R    | 0.051032    |
| Temporal_Inf_L       | 0.051016    |
| Parietal_Sup_R       | 0.038306    |



|                     |          |
|---------------------|----------|
| Olfactory_L         | 0.037668 |
| ParaHippocampal_L   | 0.027819 |
| Temporal_Pole_Mid_R | 0.021808 |
| Amygdala_L          | 0.019786 |
| Amygdala_R          | 0.019197 |
| Temporal_Pole_Sup_R | 0.013085 |
| Temporal_Pole_Sup_L | 0.012732 |
| Temporal_Pole_Mid_L | 0.007138 |
